# Supplementary material for: Stabilization of aqueous graphene dispersions utilizing a biocompatible dispersant: a molecular dynamics study
Source: Royal Society of Chemistry journal article supplement (doi:10.1039/c9cp04742e), 2019-01-01
Supplement: c9cp04742e1.pdf [file c9cp04742e1.pdf]

## Supporting Information

### **Stabilization of Aqueous Graphene Dispersions Utilizing A Biocompatible Dispersant: A Molecular Dynamics Study**

*Shirong Huang*<sup>a</sup>, *Alexander Croy*<sup>\*a</sup>, *Viktor Bezugly*<sup>a, b</sup>, *Gianaurelio Cuniberti*<sup>\*a, c</sup>

<sup>a</sup> Institute for Materials Science and Max Bergmann Center for Biomaterials, Technische Universität Dresden, 01062 Dresden, Germany

E-mail: alexander.croy@tu-dresden.de

<sup>b</sup> Life Science Inkubator Sachsen GmbH & Co. KG, Tatzberg 47, 01307 Dresden, Germany

<sup>c</sup> Dresden Center for Computational Materials Science (DCMS), TU Dresden, 01062 Dresden, Germany

E-mail: gianaurelio.cuniberti@tu-dresden.de

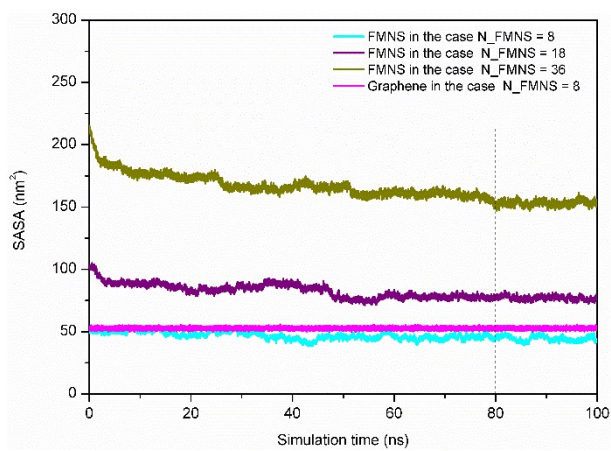

Fig. S1 SASA of FMNS as a function of simulation time in three different cases and the representative result for graphene

Table S1. Simulation parameters used in this work

| Simulation system                         | Morphology simulation part  |                              |                              | PMF simulation part            |                               |
|-------------------------------------------|-----------------------------|------------------------------|------------------------------|--------------------------------|-------------------------------|
|                                           | Morphology<br>(8 FMNS case) | Morphology<br>(18 FMNS case) | Morphology<br>(36 FMNS case) | PMF<br>(High surface coverage) | PMF<br>(Low surface coverage) |
| Number of graphene flakes                 | 1                           | 1                            | 1                            | 2                              | 2                             |
| Number of FMNS molecules                  | 8                           | 18                           | 36                           | 22                             | 12                            |
| Number of water molecules                 | 23486                       | 23284                        | 53964                        | 54978                          | 54988                         |
| Total number of atoms                     | 71554                       | 71468                        | 164444                       | 167438                         | 166948                        |
| Simulation box size (nm <sup>3</sup> )    | 9*9*9                       | 9*9*9                        | 12*12*12                     | 12*12*12                       | 12*12*12                      |
| Simulation time (ns)                      | 100                         | 100                          | 100                          | 5                              | 5                             |
| Concentration ration of graphene and FMNS | 2.13:1                      | 0.95:1                       | 0.47:1                       | /                              | /                             |

Note:

The graphene flake size in all simulations is 4 nm \* 4 nm, containing 680 carbon atoms;

Table S2. The maximum density value of both high surface coverage case and low surface coverage case at different critical positions

| <b>Position</b>                                        | <b>I</b> | <b>II</b> | <b>III</b> | <b>IV</b> | <b>V</b> | <b>VI</b> |
|--------------------------------------------------------|----------|-----------|------------|-----------|----------|-----------|
| <b>High surface coverage</b><br><b>(11 FMNS/flake)</b> | 15.7     | 12.9      | 17.7       | 14.5      | 13.6     | 13.1      |
| <b>Low surface coverage</b><br><b>(6 FMNS/flake)</b>   | 7.07     | /         | 7.76       | 9.38      | /        | 7.85      |

Table S3. Comparison results of different surfactants for the stabilization of aqueous graphene dispersions from both simulation and experimental works

| Surfactant | Simulation results                         |                                                                                      |                                                           | Obtained graphene concentration reported experimentally in other's work (µg/ml) |
|------------|--------------------------------------------|--------------------------------------------------------------------------------------|-----------------------------------------------------------|---------------------------------------------------------------------------------|
|            | Relative amount of surfactant <sup>a</sup> | Surface coverage of graphene by surfactant <sup>b</sup> (molecules/nm <sup>2</sup> ) | PMF energy barrier (kJ/mol/nm <sup>2</sup> ) <sup>c</sup> |                                                                                 |
| SDS        | 0.048                                      | 1.00                                                                                 | 15.00 <sup>1</sup>                                        | 12 <sup>2</sup>                                                                 |
| SDBS       | 0.029                                      | 0.58                                                                                 | 11.40 <sup>3</sup>                                        | 20 <sup>2</sup>                                                                 |
| SC         | 0.026                                      | 0.49                                                                                 | 10.00 <sup>4</sup>                                        | 27 <sup>2</sup>                                                                 |
| FMNS       | 0.026                                      | 0.34                                                                                 | 10.25                                                     | 200 <sup>5</sup>                                                                |
|            | this work                                  | this work                                                                            | this work                                                 |                                                                                 |

- a. relative amount of surfactant is calculated as follows, number of surfactants/numbers of carbon atoms in graphene flake.
- b. surface coverage of graphene by surfactant is calculated as follows; number of surfactants adsorbed on each graphene flake/both sides area of each graphene flake.
- c. PMF barrier is the barrier of the first local maximum energy barrier on the PMF profile.

#### Reference:

1. B. Wu and X. N. Yang, *J Phys Chem C*, 2013, 117, 23216-23223.
2. R. J. Smith, M. Lotya and J. N. Coleman, *New Journal of Physics*, 2010, 12, 125008.
3. H. Y. Sun and X. N. Yang, *Colloid Surface A*, 2014, 462, 82-89.
4. S. Lin, C. J. Shih, M. S. Strano and D. Blankschtein, *Journal of the American Chemical Society*, 2011, 133, 12810-12823.
5. T. Yang, H. Chen, Z. Qiu, R. Yu, S. Luo, W. Li and K. Jiao, *ACS applied materials & interfaces*, 2018, **10**, 4540-4547.
